# Supplementary material
Source: PubMed Central journal article supplement (PMC7357298)
Supplement: NIHMS1582599-supplement-2.pdf [file NIHMS1582599-supplement-2.pdf]

## **CRaft-ID Detailed Supplemental Protocol:**

### **Cell Infection:**

- Seed  $4.2 \times 10^6$  cells on 4 10cm plates the day before infection
- Add X  $\mu$ L of virus (to obtain an MOI of 0.15) to the cells in media supplemented with  $8 \mu\text{g/mL}$  polybrene
- 24 hours later, remove viral media and replace with media supplemented with  $2 \mu\text{g/mL}$  puromycin and select for 3 days

### **MicroRaft preparation:**

#### **\*NOTE – do not allow microRaft to dry in between washes or media changes**

- Wash microRaft array three times with 2ml 1x PBS, incubating for 5 minutes each wash
- Coat array with 2ml 0.001% w/v poly-D-lysine (PDL) hydrobromide (Millipore Sigma #P6407) resuspended in sterile  $\text{H}_2\text{O}$  for 1hr at  $37^\circ\text{C}$
- Aspirate and remove PDL coating
- Wash twice with 3ml 1x PBS, 10 minutes each
- Add 2ml DMEM+10%FBS and store in  $37^\circ\text{C}$  until cells are ready for plating

### **Cell Dissociation (volumes used are for T75 flask):**

- Remove and discard culture medium
- Rinse cells with 15ml 1x PBS buffer
- Add 10ml TrypLE to flask and incubate for 5 minutes at  $37^\circ\text{C}$ . Gently tap flask to detach cells
- Add 20ml complete growth media (DMEM+10%FBS) and gently pipette across flask to dissociate cells
- Transfer cell suspension to 50ml conical tube
- Centrifuge at  $200 \times g$  for 5mins to pellet
- Aspirate supernatant and resuspend in 2ml media
- Pipette 20x with P1000 micropipette to break up colonies
- Add 18ml media and strain cell suspension through 40um cell strainer (Fisher #087711)

### **Cell Plating:**

- Count cells and resuspend to a concentration of  $1.2 \times 10^4$  cells/ml
- Remove and discard final DMEM+10%FBS wash from microRaft array and immediately add 1ml cell suspension across array ( $1.2 \times 10^4$  cells/array)
  - o Do not allow rafts to dry in between aspirating wash media and seeding cells
- Secure microRaft in swinging-bucket centrifuge and spin for 4 minutes at  $400 \times g$
- Carefully move and place microRaft in  $37^\circ\text{C}$ , 5%  $\text{CO}_2$  incubator
- After 24hrs, add 2ml fresh media

### **Stressing cells with sodium arsenite:**

- 72hrs after seeding, remove culture medium from microRaft array and add 2ml 500uM sodium (meta)arsenite in DMEM+5%FBS. Incubate for 1hr at  $37^\circ\text{C}$ .

### **Fixing and Staining on microRaft:**

- Add 1ml of 12% PFA to microRaft, for a final fixation concentration of 4% PFA. Incubate for 15mins at room temperature
- Remove and discard media
- Wash fixed cells three times with 2ml Wash Buffer (0.01% Triton-X in 1x PBS)

- Simultaneously block and permeabilize cells:
  - o 0.1% Triton-X with 5% goat serum in 1x PBS for 45mins at room temperature
- 1X wash with 1ml Wash Buffer
- Incubate overnight in 1ml primary antibody solution at 4°C:
  - o Wash buffer + 5% goat serum and rabbit anti-G3BP1 (1:1000, MBL #RN08PW)
- 3X washes with 1ml Wash buffer, 5 minutes each
- Incubate in 1ml secondary antibody solution at room temperature:
  - o Wash buffer + 5% goat serum and Alexa Fluor 555 goat anti-rabbit (1:1000, Invitrogen #A21429)
- 3X washes with 1ml Wash buffer, 5 minutes each
- Incubate in 1ml Hoescht33342 (1ug/ml in PBS, Thermo Scientific #62249) for 30 minutes at room temperature
- 2X washes with 1ml Wash buffer, 5 minutes each
- Store in 2ml 1x PBS with 1% PenStrep

## **gRNA Library Preparation Protocol:**

\*NOTE – It is important to perform DNA extraction and set up first PCR reaction in a pre-AMP PCR clean space

### **DNA Isolation:**

- Collect raft into 6ul Quick Extract Buffer (Lucigen #QE09050) on ice and proceed to DNA extraction prior to storage at -20°C
- Extract DNA with the following protocol:
  - o Vortex 15 seconds
  - o Heat at 65°C for 6 minutes
  - o Vortex 15 seconds
  - o Heat at 98°C for 2 minutes
  - o Chill on Ice

### **First PCR (25ul rxn) – Add directly to tube with collected microRaft:**

- Reaction components:
  - o 12.5 ul 2X Q5 High-Fidelity DNA polymerase (NEB #M0492L)
  - o 2.5 ul 10uM PCR1-rev primer
  - o 2.5 ul 10uM PCR1-fwd indexed primer
  - o 2.5 ul H2O
  - o 5 ul DNA extract (already in tube)
- Protocol:
  - o 98°C 30 sec
  - o 98°C 15 sec
  - o 68°C 1 min
  - o 72°C 1 min
  - o GOTO step 2 – 21X (22 cycles total)
  - o 72°C 2 min
  - o Hold 4°C

### **Pool First PCR and cleanup:**

- Pool 20ul from each sample from 4 unique PCR1 indices (save 5ul at -20°C)
- Cleanup pool with MinElute PCR Purification Kit (Qiagen)

\*all spin steps performed at 13,000rpm, 30 sec

- Add 400ul (5X) buffer PB to PCR1 pool
- Spin through MinElute column
- Transfer flow-through back onto the column for double-binding and spin again
- Add 750ul buffer PE to wash, spin, discard flow-through
- Spin column an additional 1 min to remove residual ethanol
- Elute with 12.5ul Buffer EB. Let column stand for 1min prior to spin
- Transfer flow-through back to column and spin again for double elution

### **Second PCR (25ul rxn):**

- Reaction components:
  - 12.5 ul 2X Q5 High-Fidelity DNA polymerase (NEB #M0492L)
  - 1.25 ul 20uM PCR2 Fwd Primer
  - 1.25 ul 20uM PCR2 Rev Primer
  - 5ul template cleaned from PCR1 (only use half, save other half at -20°C)
  - 5ul H2O
- Protocol:
  - 98°C 30 sec
  - 98°C 15 sec
  - 72°C 1 min
  - GOTO step2 9X (10 cycles total)
  - 72°C 2 min
  - Hold at 4°C

### **Gel Extraction of Final Library:**

- Prepare 3% Low-melt agarose gel (NuSieve GTG #50080) in 1% TBE
- Add 8ul Orange DNA loading dye (Thermo R0631) to 25ul rxn
- Load on gel, run 95V for 50 mins
- PCR will yield 3 products, the longest of which contains the correct gRNA insert (249bp)
- Gel extract top band (249bp) from gel (Qiagen Gel Extraction Kit)
  - Add 600ul Buffer QG to melt gel. Melt at room temperature on benchtop (do not heat)
  - After gel is melted, add 200ul isopropanol and mix well
  - Load on column and spin max speed, 30 sec
  - Wash column with 500ul buffer QG, spin max speed 30 sec
  - Wash with 750ul buffer PE, spin max speed 30 sec
  - Discard flow-through and spin max speed, 2 min to dry column
  - Elute in 12.5ul buffer EB. Let column stand for 1min prior to spin
  - Transfer flow-through back to column and spin again for double elution
  - Quantify purified library on D1000 tapestation
- \*\*NOTE – alternatively, users may quantify all libraries on the Tapestation prior to gel extraction. After quantification of the desired produce, libraries can be pooled in equimolar ratios and loaded in a single well of an agarose gel to remove unwanted adapter dimer products. This is necessary for users who are preparing many sequencing libraries in parallel.

### **Recovery of rafts that failed sequencing:**

\*Some of the rafts pooled for sequencing did not yield a gRNA insert in the sequencing data. To recover those samples, the remainder of material saved before pooling from PCR1 was used with additional cleanup steps to make a new library.

### **Redo PCR1 with 10 additional cycles:**

- Reaction components:
  - o 12.5 ul 2X Q5 High-Fidelity DNA polymerase (NEB #M0492L)
  - o 2.5 ul 10uM PCR1-rev primer
  - o 2.5 ul 10uM PCR1-fwd indexed primer (same index used from first PCR1 reaction)
  - o 2.5 ul H2O
  - o 5 ul PCR1 product saved before pooling
- Protocol:
  - o 98°C 30 sec
  - o 98°C 15 sec
  - o 68°C 1 min
  - o 72°C 1 min
  - o GOTO step 2 – 9X (10 cycles total)
  - o 72°C 2 min
  - o Hold 4°C

### **Cleanup PCR1 reaction with TBE gel isolation:**

- Add 8ul Orange DNA loading dye (Thermo R0631) to PCR reaction and load on 8% TBE gel (Thermo #EC6215). Run at 200V in 1X TBE buffer.
- There will be two products, a small one without the insert (~130bp) and a larger one with the insert (~160bp). Using a razor, isolate the top band from the gel.
- Gel Extraction Procedure
  - o Using a plastic pestle in an Eppendorf tube, crush the gel piece in 300ul PAGE buffer (300nM NaCl, 10mM TRIS PH8, 1mM EDTA).
  - o Rotate overnight at 4°C
  - o Mix in thermomixer 37°C, 1hr, 1200rpm
  - o Transfer all contents of the tube to a SpinX column fitted with a 0.45 uM filter. Spin with lid open 13,000xg for 10 min, room temperature. Discard the gel pieces trapped in the column.
  - o Add 1ul GlycoBlue (Thermo AM9515) and 50ul 3M NaOAc to the flow-through.
  - o Add 1mL 100% EtOH, vortex, store at -80°C for 2hrs (or overnight)
  - o Spin 13,000 x g, 4°C, 15 min
  - o Decant the supernatant and wash the pellet 2X with 1mL 70% EtOH
  - o After the last spin, remove residual liquid with fine pipette tip, dry at room temp 5 mins
  - o Resuspend pellet in 5ul H2O.
- Pool the purified DNA from uniquely indexed samples at equal ratios.
- Perform PCR2 and final library gel extraction with the same PCR2 method outlined above, using 1ul of the PCR1 pool as the template and 9ul H2O in the reaction.
